# Supplementary material
Source: PubMed Central journal article supplement (PMC9012696)
Supplement: NIHMS1782133-supplement-1.pdf [file NIHMS1782133-supplement-1.pdf]

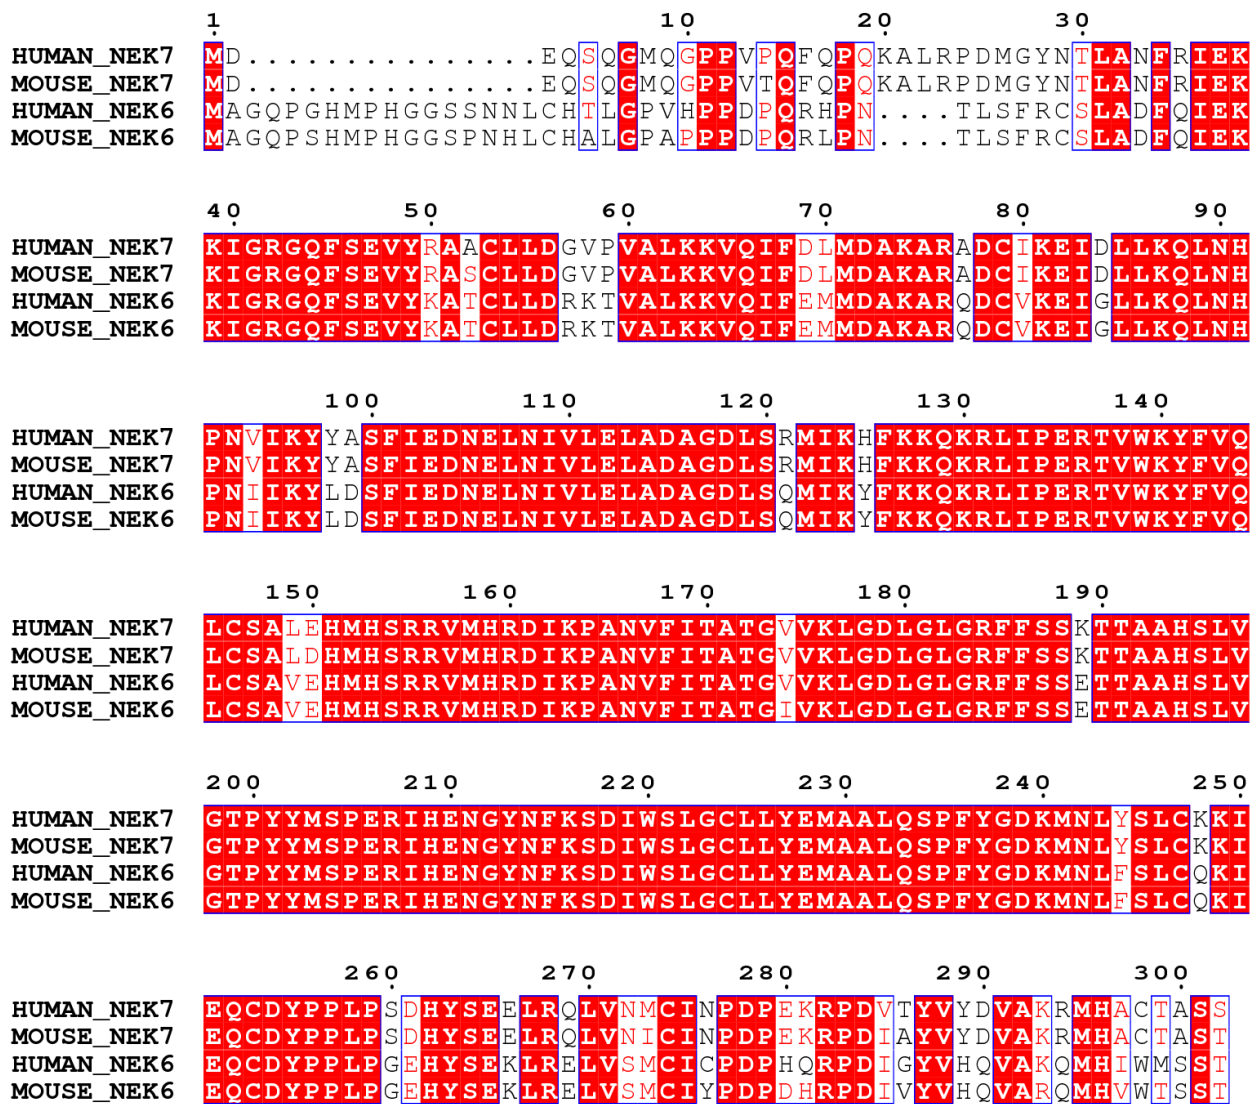

Supplementary Figure 1. Multiple sequence alignment of NEK7 and NEK6 was performed by the esprint server.

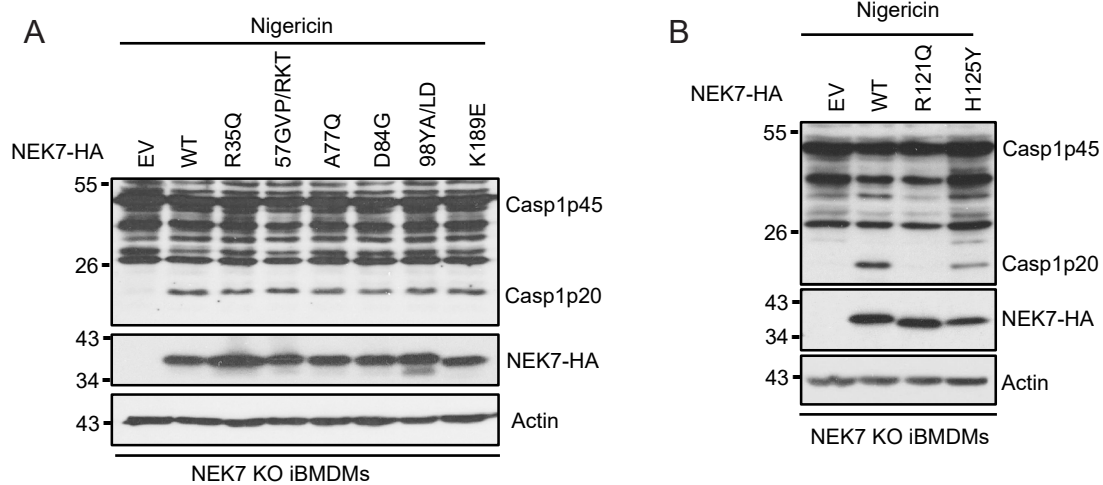

Supplementary Figure 2. **(A-B)** Immortalized NEK7-deficient macrophages were reconstituted with wild-type NEK7 or indicated NEK7 mutant by lentiviral transduction. Transduced macrophages were then stimulated with 5  $\mu$ M nigericin for 1 hour after LPS priming. Mixtures of cell lysate and supernatant were immunoblotted with indicated antibodies. EV, empty vector.

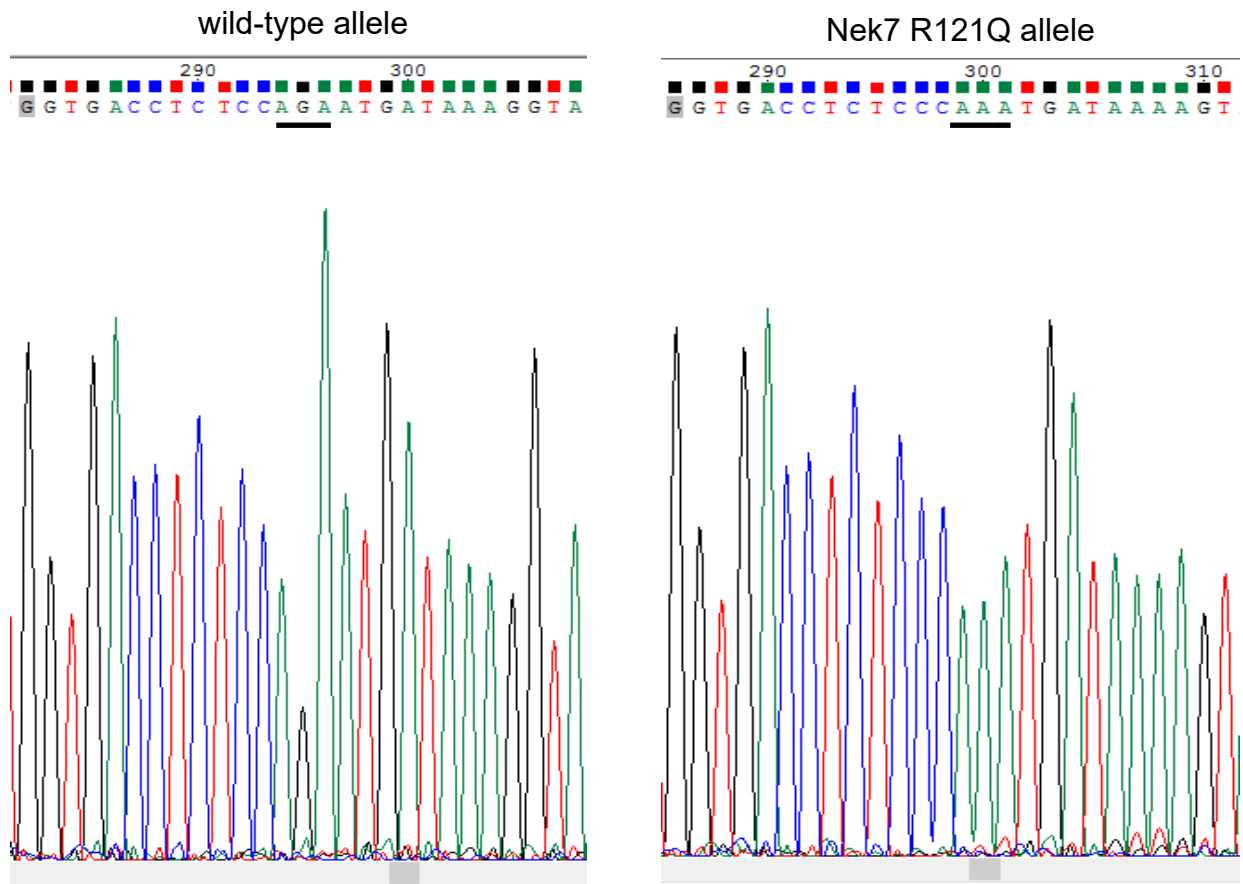

Supplementary Figure 3. Sequencing verification of the codon replacement for NEK7 R121Q (AGA -- AAA) by CRISPR-cas9 gene-editing system.
